# Supplementary material
Source: Springer Nature journal article supplement (https://www.springermedizin.de/resource/supplementary/12891_2012_1851_MOESM2_ESM.pdf/9508630)

### A GAG accumulated in pellet

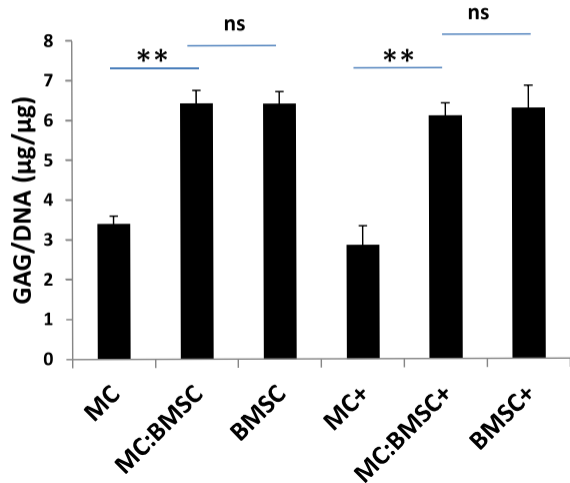

### B GAG expected vs. experimental GAG

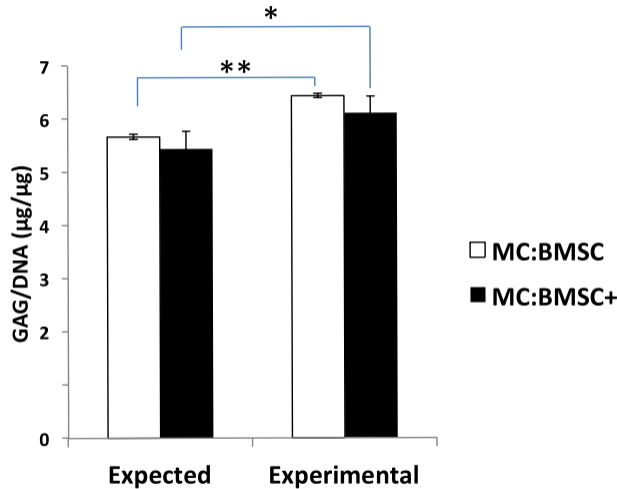

Supplement: MOESM2 [file 9508630]
